# Supplementary material for: A recyclable cobalt(iii)–ammonia complex catalyst for catalytic epoxidation of olefins with air as the oxidant
Source: Royal Society of Chemistry journal article supplement (doi:10.1039/d0nj05466f), 2021-01-01
Supplement: d0nj05466f1.pdf [file d0nj05466f1.pdf]

## Supporting information

**Table S1.** Performance comparison of epoxidation of  $\alpha$ -pinene over various heterogeneous catalysts.

| Entry | Catalyst                                                                                                                                  | Solvent            | Oxidation                | Initiator                                      | Temp. (°C) | Time (h) | Epoxide Yield (%) | Ref.                                              |
|-------|-------------------------------------------------------------------------------------------------------------------------------------------|--------------------|--------------------------|------------------------------------------------|------------|----------|-------------------|---------------------------------------------------|
| 1     | [Co(NH <sub>3</sub> ) <sub>6</sub> ]Cl <sub>3</sub>                                                                                       | DMF                | 40 ml/min air            | –                                              | 90         | 5        | 11.1              | <i>This work</i>                                  |
| 2     | [Co(NH <sub>3</sub> ) <sub>6</sub> ]Cl <sub>3</sub>                                                                                       | DMF                | 40 ml/min air            | CHP <sup>a</sup>                               | 90         | 5        | 95.7              | <i>This work</i>                                  |
| 3     | 7%CoOx/MOR                                                                                                                                | DMF                | 40 ml/min air            | CHP                                            | 90         | 5        | 81.2              | <i>Mol. Catal., 2019, 463, 8</i>                  |
| 4     | Co–MOR(L)                                                                                                                                 | DMF                | 40 ml/min air            | TBHP <sup>b</sup>                              | 90         | 5        | 84.5              | <i>J. Mol. Catal. A. Chem., 2015, 400, 71</i>     |
| 5     | Co-ZSM-5                                                                                                                                  | DMF                | 40 ml/min air            | TBHP                                           | 90         | 5        | 79.9              | <i>Catal. Commun., 2012, 21, 68</i>               |
| 6     | NaCsCoY20                                                                                                                                 | DMF                | 0.55 MPa O <sub>2</sub>  | –                                              | 100        | 4        | 25.0              | <i>J. Mol. Catal. A. Chem., 2007, 277, 72</i>     |
| 7     | [Co <sub>4</sub> ( $\mu_3$ -O) <sub>4</sub> ( $\mu$ -C <sub>6</sub> H <sub>5</sub> CO <sub>2</sub> ) <sub>4</sub> (4-CNpy) <sub>4</sub> ] | Dioxane            | 15 ml/min air            | –                                              | 100        | 24       | 20.9              | <i>J. Mol. Catal. A. Chem., 2004, 223, 39</i>     |
| 8     | Mn(III) acetate                                                                                                                           | DMF/toluene        | 50 ml/min air            | –                                              | 130        | 6        | 35.0              | <i>Appl. Catal. A. Gen., 2017, 546, 1-6</i>       |
| 9     | NCNTs                                                                                                                                     | CH <sub>3</sub> CN | 1.5 MPa O <sub>2</sub>   | –                                              | 80         | 4        | 20.6              | <i>Catal. Sci. Technol., 2015, 5, 3935</i>        |
| 10    | MoCl <sub>2</sub> O <sub>2</sub> Ln/TiO <sub>2</sub>                                                                                      | CH <sub>3</sub> CN | O <sub>2</sub> /UV light | –                                              | 80         | 18       | 72.0              | <i>Micropor. Mesopor. Mat., 2018, 340, 9</i>      |
| 11    | Salen Mn <sup>III</sup> Cl–ADC                                                                                                            | CH <sub>3</sub> CN | 5 ml/min O <sub>2</sub>  | Isobutyraldehyde <sup>c</sup>                  | 25         | 3        | 84.9              | <i>Cellulose., 2018, 25, 1281–1289</i>            |
| 12    | Biomimetic Iron Catalyst                                                                                                                  | CH <sub>3</sub> CN | Air                      | Ethyl 2-cyclohexanone-carboxylate <sup>d</sup> | 25         | 20       | 44.0              | <i>Angew. Chem. Int. Ed., 2011, 50, 1425–1429</i> |

<sup>a</sup>CHP: Cumene hydroperoxide, <sup>b</sup>TBHP: *tert*-Butyl hydroperoxide, <sup>c</sup>isobutyraldehyde and <sup>d</sup>2-cyclohexanone-carboxylate: Sacrificial reagent.

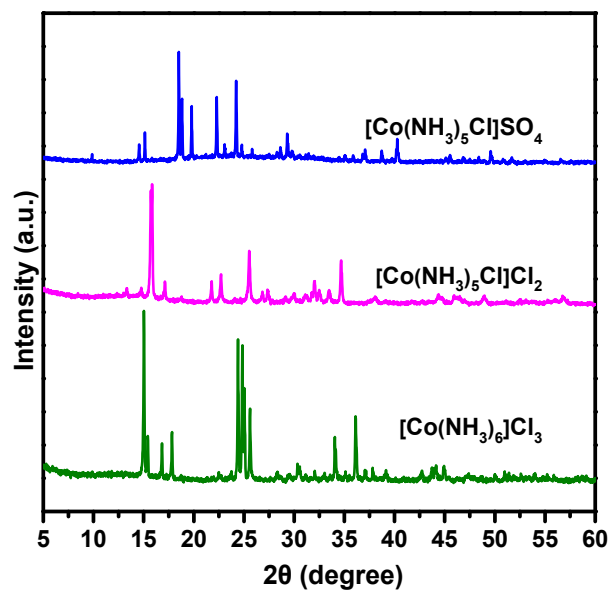

Fig. S1. The XRD patterns of different cobalt ammonia complexes.

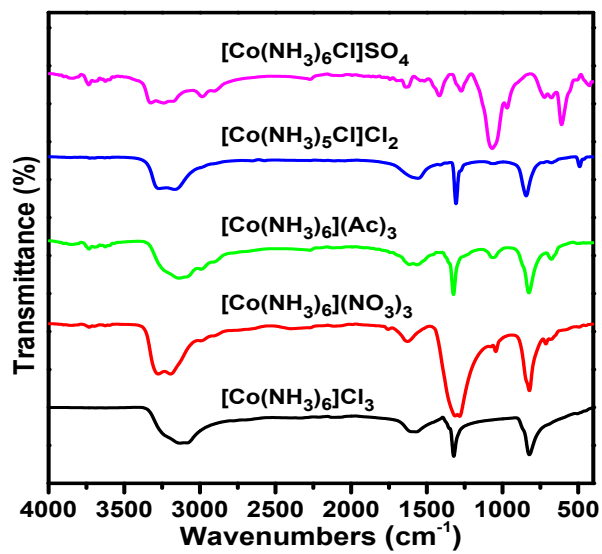

Fig. S2. The IR spectra of different cobalt ammonia complexes.

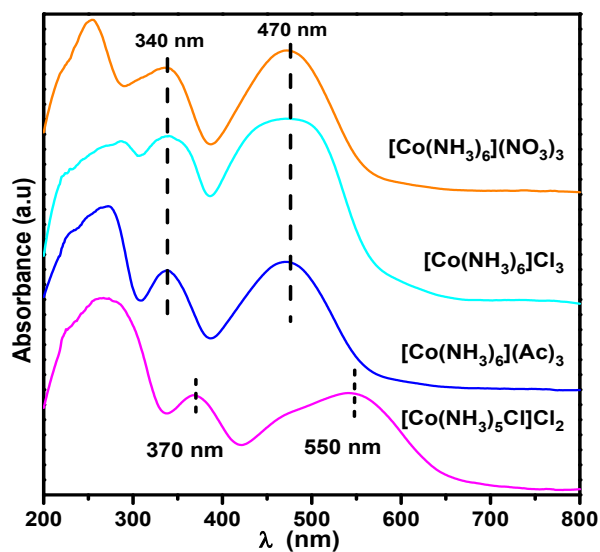

**Fig. S3.** UV-Vis spectra of synthesized  $[\text{Co}(\text{NH}_3)_5\text{Cl}]\text{Cl}_2$ ,  $[\text{Co}(\text{NH}_3)_6](\text{Ac})_3$ ,  $[\text{Co}(\text{NH}_3)_6]\text{Cl}_3$  and  $[\text{Co}(\text{NH}_3)_6](\text{NO}_3)_3$ .

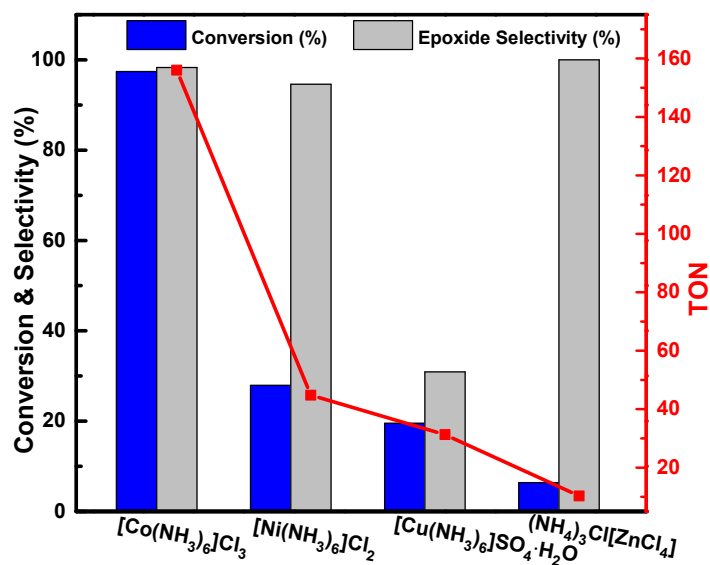

**Fig. S4.** The catalytic performance of different metal ammonia complexes. Conditions: catalyst, 5 mg;  $\alpha$ -pinene, 3 mmol; solvent, DMF 10 g; initiator, CHP 0.3 mmol; temperature, 90 °C; flow rate of air, 40 ml/min; time, 5 h.

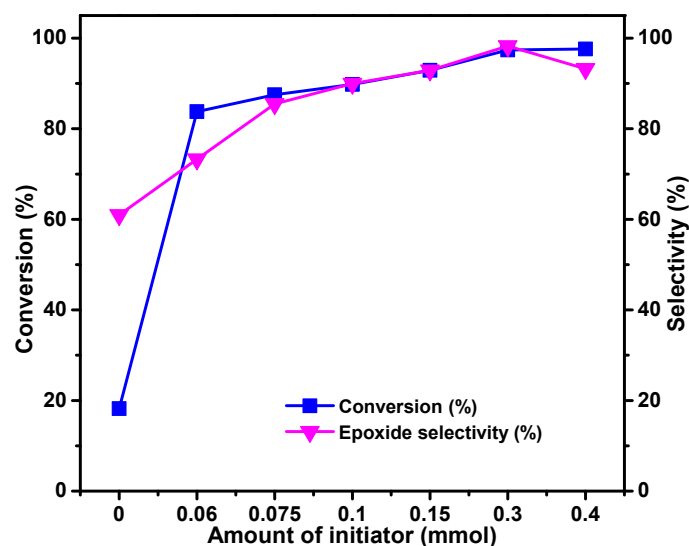

**Fig. S5.** The amount effect of initiator on the epoxidation of  $\alpha$ -pinene.

Conditions: catalyst, 5 mg;  $\alpha$ -pinene, 3 mmol; solvent, DMF 10 g; initiator, CHP; temperature, 90 °C; flow rate of air, 40 ml/min; time, 5 h.

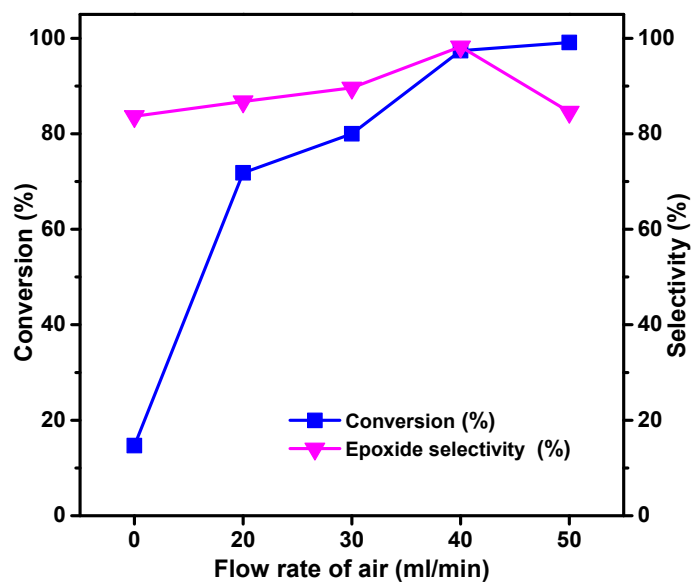

**Fig. S6.** The flow rate of air on the epoxidation of  $\alpha$ -pinene.

Conditions: catalyst, 5 mg;  $\alpha$ -pinene, 3 mmol; solvent, DMF 10 g; initiator, CHP; temperature, 90 °C; time, 5 h.

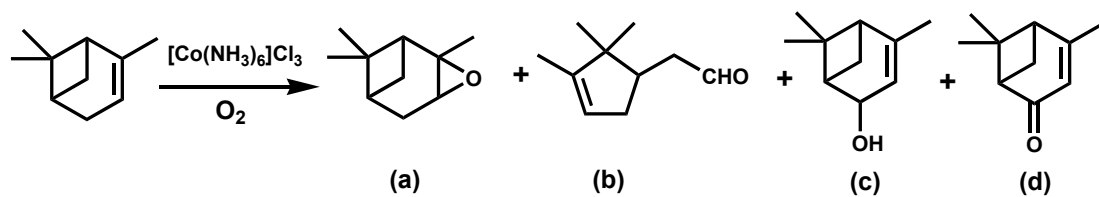

**Fig. S7.** Schematic illustration for the epoxidation of  $\alpha$ -pinene. (a)  $\alpha$ -pinene oxide (b) Camphorenal aldehyde (c) Verbenol (d) Verbenone

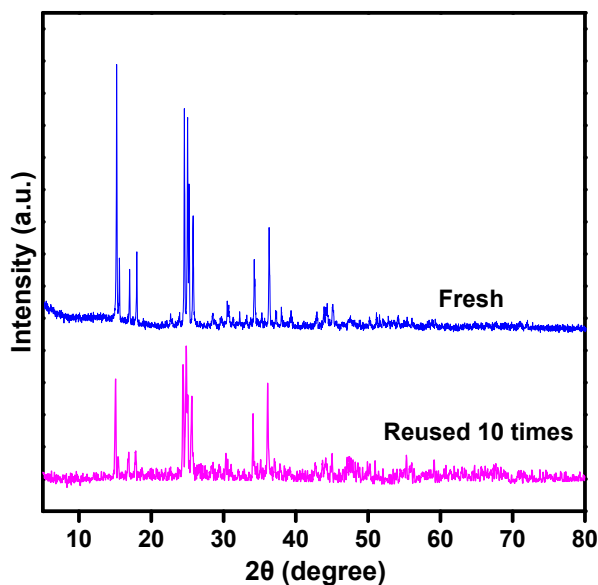

**Fig. S8.** The XRD patterns of fresh  $[\text{Co}(\text{NH}_3)_6]\text{Cl}_3$  and reused 10 times.

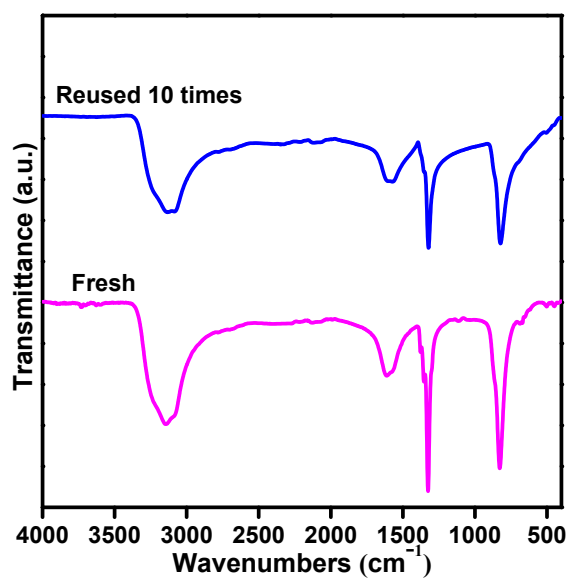

**Fig. S9.** The IR spectra of fresh  $[\text{Co}(\text{NH}_3)_6]\text{Cl}_3$  and reused 10 times.

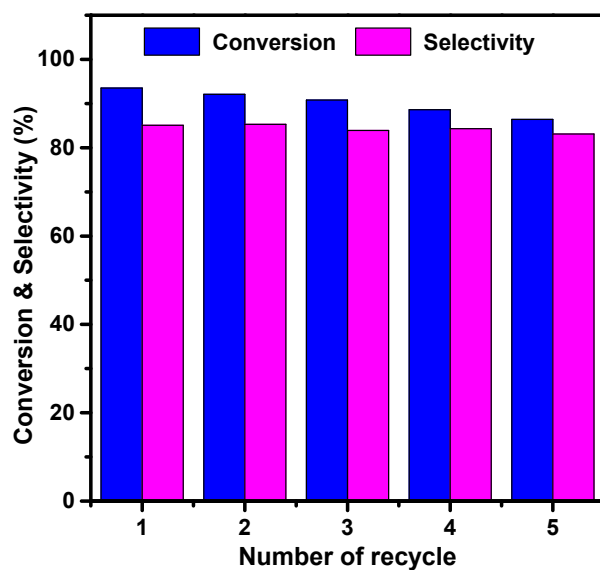

**Fig. S10.** Results of recyclable performance of  $[\text{Co}(\text{NH}_3)_5\text{Cl}]\text{Cl}_2$  catalyst. Conditions: catalyst,  $[\text{Co}(\text{NH}_3)_5\text{Cl}]\text{Cl}_2$ ;  $\alpha$ -pinene, 3 mmol; solvent, DMF 10 g; initiator, CHP 0.3 mmol; temperature, 90 °C; flow rate of air, 40 ml/min; time, 5 h.

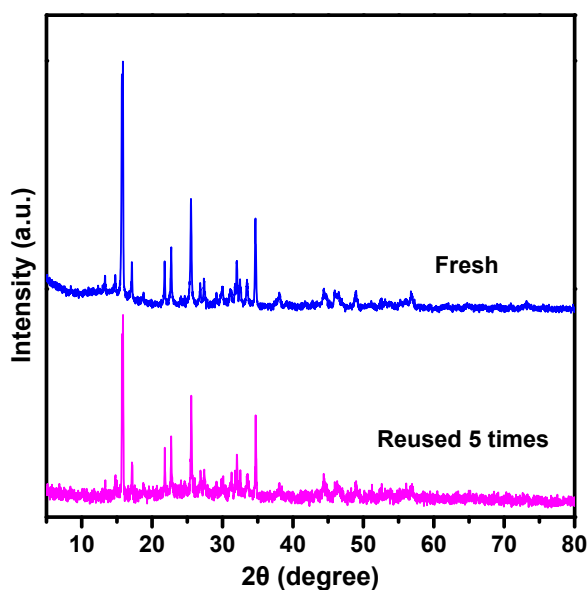

**Fig. S11.** The XRD patterns of fresh  $[\text{Co}(\text{NH}_3)_5\text{Cl}]\text{Cl}_2$  and reused 5 times.

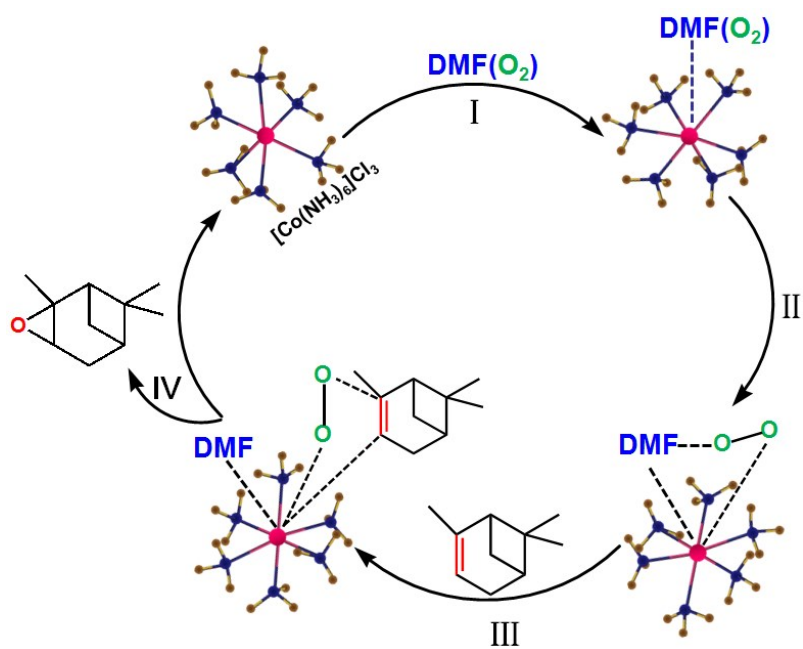

**Fig. S12.** Proposed mechanism for air activation and epoxidation.
